# Supplementary material for: Unveiling BiVO4 photoelectrocatalytic potential for CO2 reduction at ambient temperature
Source: Royal Society of Chemistry journal article supplement (doi:10.1039/d4ma00232f), 2024-01-01
Supplement: d4ma00232f1.pdf [file d4ma00232f1.pdf]

SUPPORTING MATERIALS

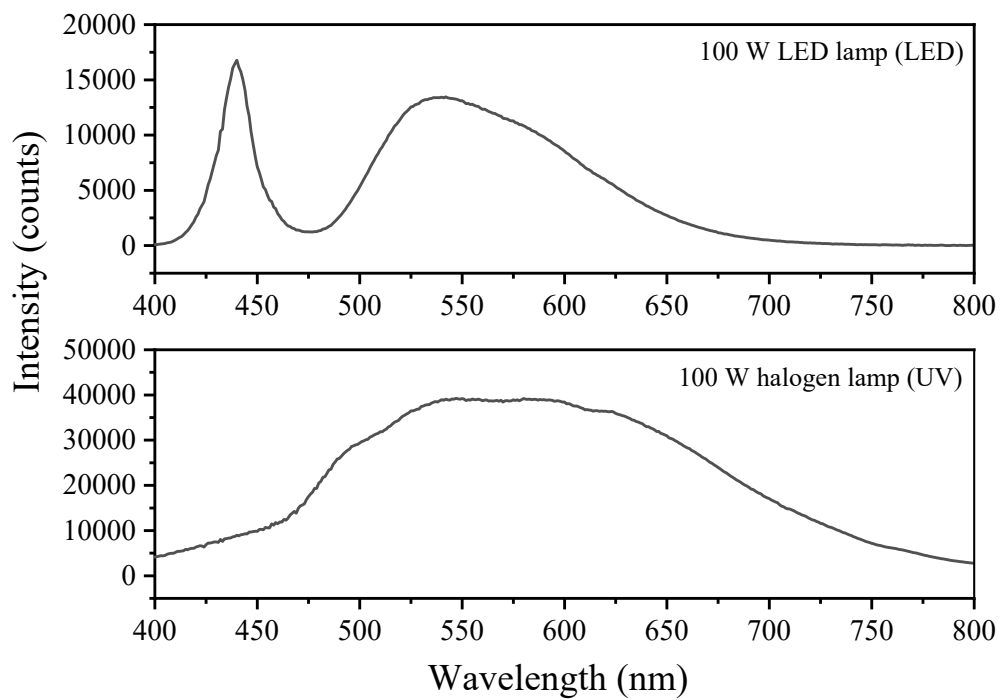

Figure S1. Spectra of the light sources (LED and UV) used in the trials.

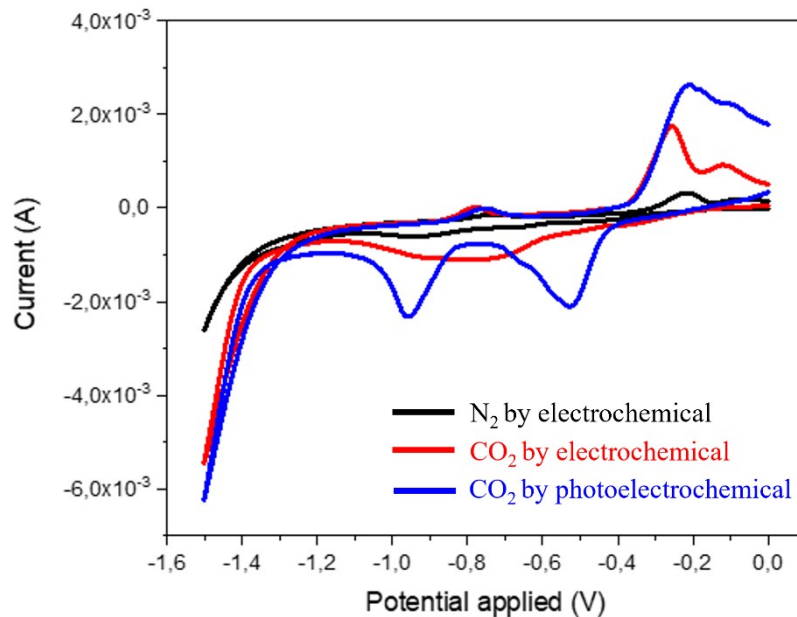

Figure S2. Cyclic voltammetry profiles of the as-synthesized  $BiVO_4$  applying a potential window from  $0.1$  to  $-1.5$  V vs Ag/AgCl at a sweep rate of  $20$   $mV s^{-1}$ . The measurements were conducted under two different conditions: under  $N_2$  (black line) and  $CO_2$  saturation (red line). Additionally, the experiment was repeated, keeping the aforementioned conditions, under  $CO_2$  saturation and LED illumination, as an irradiation source (blue line).

Cyclic voltammetry was performed under the conditions mentioned in section 2.4. flow cell configuration, applying a potential window from  $0.1$  to  $-1.5$  V vs Ag/AgCl at a sweep rate of  $20$   $mV s^{-1}$  with LED illumination, as an irradiation source. We underscore that a reduction mechanism is observed in cyclic voltammetry for the electrochemical process, centered at  $-0.8$  V vs Ag/AgCl. This suggests that it may be a convolution of two other mechanisms with a maximum near  $-0.85$  and  $-0.7$  V vs Ag/AgCl. Hence, the peaks observed in the photoelectrochemical cyclic voltammetry can be attributed to a shift of these mechanisms, related to a distinct adsorption mechanism of  $CO_2$  induced by light, as well as to an increased frequency of electron transitions, also stirred by light. Although the cyclic voltammetry typically maintains its profile with peaks increasing when the light is on – comparing electrochemical and photoelectrochemical methods –, there can be changes in the cyclic voltammetry profile when turning the light on or off<sup>1</sup>. The peak at  $-0.5$  V vs Ag/AgCl is associated with the first steps of  $CO_2$  reduction, possibly carbon monoxide (CO)<sup>2</sup>. We assume that this is a reaction intermediate, as noticed by other similar experiments<sup>3</sup>.

Regarding the peak around  $-1.0$  V, it can be attributed to the quasi-reversible redox process,  $\text{Bi}^{3+} \leftrightarrow \text{Bi-metal}^4$ , which leads to the formation of Bi– $\text{BiVO}_4$  heterojunctions.

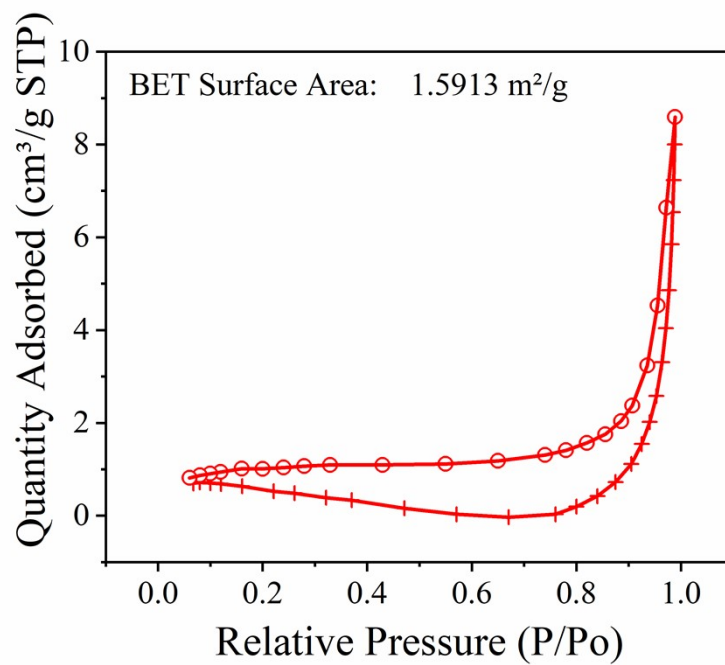

Figure S3. BET measure of as-synthesized  $\text{BiVO}_4$ .

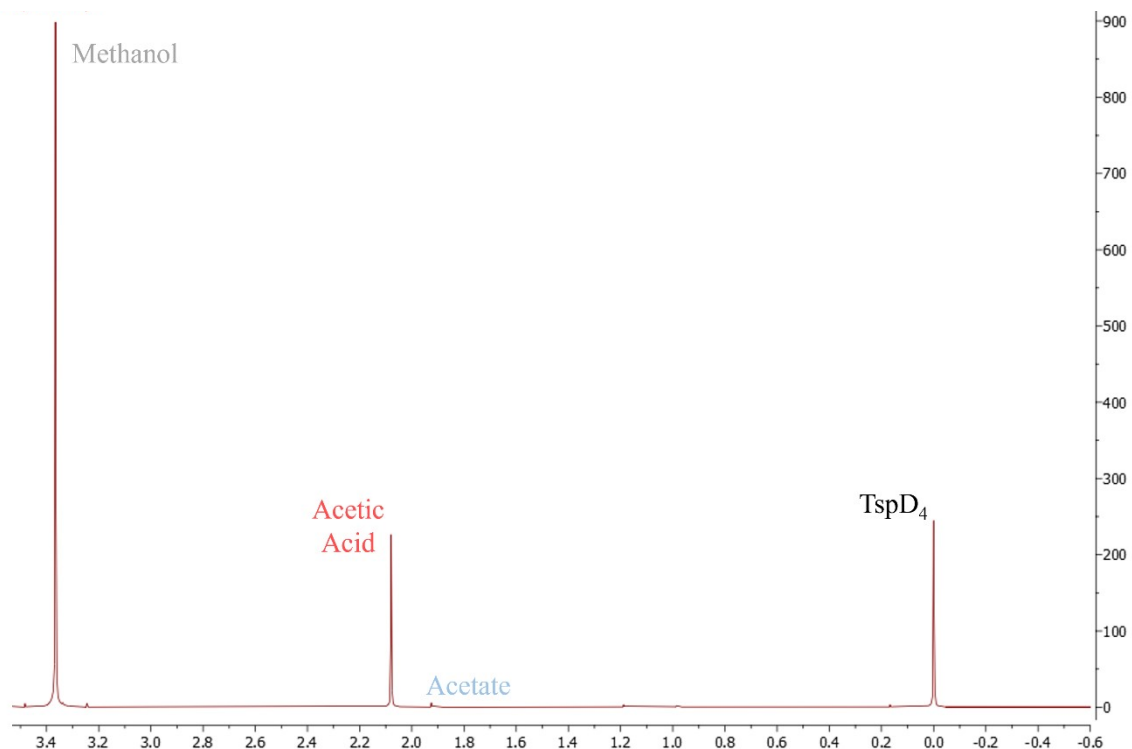

Figure S4. <sup>1</sup>H NMR spectrum of liquid chemicals from CO<sub>2</sub>R of as-synthesized BiVO<sub>4</sub> induced by photoelectrochemical powered by LED illumination. The reactions were made in 0.5M Na<sub>2</sub>HCO<sub>3</sub> at pH 8 for 6 h. Priorly to the reactions, the electrolyte was purged with CO<sub>2</sub> gas. A 100W LED lamp and chronoamperometric measurements (at -1.0 V vs Ag/AgCl) source were applied for photoelectron reactions. All experiments were performed with recirculation through the reservoir. More details are found in section 2.4 flow cell configuration.

## References

1. P. B. Pati, R. Wang, E. Boutin, S. Diring, S. Jobic, N. Barreau, F. Odobel and M. Robert, *Nat. Commun.*, 2020, **11**, 3499.
2. E. H. Dias, G. T. S. T. Da Silva, J. C. Da Cruz and C. Ribeiro, *ChemElectroChem*, 2022, **9**(11), e202200206.
3. G. O. Larrazábal, A. J. Martín and J. Pérez-Ramírez, *J. Phys. Chem. Lett.*, 2017, **8**, 3933–3944.
4. Y. Arora, S. Battu, S. Haram and D. Khushalani, *Sci. Rep.*, 2018, **8**, 12752.
